# Supplementary material
Source: PubMed Central journal article supplement (PMC9156789)
Supplement: 41598_2022_12032_MOESM1_ESM.pdf [file 41598_2022_12032_MOESM1_ESM.pdf]

## SUPPLEMENTAL INFORMATION

**Supplementary Table S1.** Patient demographics for COVID-19 convalescent sera collected 5 months post-diagnosis<sup>a</sup>.

| Sample ID | Sex    | Age Range | DiaSorin Liaison Spike IgG <sup>b,e</sup> | S1 IgG Titer <sup>e</sup> | Surrogate virus neutralization <sup>c</sup> | Live virus neutralizing titer <sup>d</sup> |
|-----------|--------|-----------|-------------------------------------------|---------------------------|---------------------------------------------|--------------------------------------------|
| 00003     | Male   | 60-69     | 70.2                                      | 6106                      | 93.5                                        | 224                                        |
| 00006     | Male   | 60-69     | 101                                       | 25488                     | 92.1                                        | 38                                         |
| 00007     | Male   | 20-29     | 36.5                                      | 1388                      | 55.0                                        | 10                                         |
| 00010     | Female | 50-59     | 53.3                                      | 1825                      | 76.0                                        | 20                                         |
| 00012     | Female | 60-69     | 48.8                                      | 1793                      | 80.8                                        | 20                                         |
| 00015     | Female | 30-39     | 16                                        | 441                       | 47.4                                        | 0                                          |
| 00019     | Male   | 15-20     | 23.8                                      | 417                       | 49.5                                        | 0                                          |
| 00020     | Female | 70-79     | 71.6                                      | 2122                      | 77.4                                        | 10                                         |
| 00021     | Male   | 30-39     | 24                                        | 1401                      | 78.7                                        | 0                                          |
| 00022     | Male   | 40-49     | 22.6                                      | 1122                      | 60.8                                        | 20                                         |
| 00023     | Male   | 20-29     | 25.5                                      | 1167                      | 69.1                                        | 0                                          |
| 00024     | Female | 20-29     | 34.8                                      | 1218                      | 64.0                                        | 0                                          |
| 00025     | Female | 30-39     | 39.6                                      | 1434                      | 63.2                                        | 10                                         |
| 00026     | Female | 40-49     | 66.2                                      | 4851                      | 89.1                                        | 80                                         |
| 00028     | Female | 20-29     | 46.8                                      | 1623                      | 80.0                                        | 40                                         |
| 00034     | Female | 60-69     | 68.6                                      | 5073                      | 79.4                                        | 20                                         |
| 00035     | Male   | 50-59     | 46.6                                      | 1649                      | 76.3                                        | 56                                         |
| 00050     | Male   | 30-39     | 22.3                                      | 1101                      | 58.2                                        | 10                                         |
| 00054     | Female | 70-79     | 43.4                                      | 1387                      | 74.3                                        | 40                                         |
| 00058     | Female | 30-39     | 20.4                                      | 1171                      | 44.1                                        | 10                                         |
| 00059     | Female | 50-59     | 94.5                                      | 6663                      | 96.9                                        | 112                                        |
| 00063     | Male   | 20-29     | 37.4                                      | 1257                      | 70.8                                        | 28                                         |

<sup>a</sup> RT-PCR positive patients from March 2020, and serum collected in July/August 2020.

<sup>b</sup> Detection of IgG against S1/S2 antigens of SARS-CoV-2. AU/mL;  $\geq 15$ , positive.

<sup>c</sup> Percent inhibition of recombinant SARS-CoV-2 RBD binding to human ACE2. Cutoff value of 30% or greater is interpreted as positive for SARS-CoV-2 neutralizing antibodies, as per the manufacturer.

<sup>d</sup> Microneutralization assay with live SARS-CoV-2 virus.

<sup>e</sup> Spearman rank correlation,  $r=0.948$ .

**Supplementary Table S2.** Patient demographics for serum samples collected from naïve individuals.

| Sample ID | Sex    | Age Range | S1 IgG Titer | Surrogate virus neutralization <sup>a</sup> |
|-----------|--------|-----------|--------------|---------------------------------------------|
| 18        | Female | 20-29     | 80.50        | 4.68                                        |
| 26        | Male   | 20-29     | 194          | 10.66                                       |
| 33        | Female | 20-29     | 0            | 7.69                                        |
| 34        | Male   | 20-29     | 84.5         | 11.63                                       |
| 21        | Male   | 30-39     | 22           | 7.83                                        |
| 22        | Female | 30-39     | 30           | 10.01                                       |
| 36        | Male   | 30-39     | 0            | 13.11                                       |
| 37        | Female | 30-39     | 0            | 11.03                                       |
| 10        | Male   | 40-49     | 0            | 0.05                                        |
| 13        | Female | 40-49     | 46.36        | 8.16                                        |
| 23        | Female | 40-49     | 39.5         | 9.45                                        |
| 24        | Male   | 40-49     | 29.5         | 13.25                                       |
| 14        | Male   | 50-59     | 0            | 8.67                                        |
| 16        | Female | 50-59     | 116.64       | 2.41                                        |
| 25        | Male   | 50-59     | 54.5         | 4.17                                        |
| 27        | Female | 50-59     | 121          | 9.87                                        |
| 19        | Male   | 60-69     | 0            | 5.79                                        |
| 20        | Female | 60-69     | 42.02        | 9.18                                        |
| 30        | Male   | 60-69     | 27           | 9.78                                        |
| 32        | Female | 60-69     | 59           | 11.21                                       |

<sup>a</sup> Percent inhibition of recombinant SARS-CoV-2 RBD binding to human ACE2. Cutoff value less than 30% is interpreted as negative for SARS-CoV-2 neutralizing antibodies, as per the manufacturer.

**Supplementary Table S3.** Complete listing of peptides on the pan-coronavirus immunoarray and associated signal intensity recorded for each serum sample. [See MS Excel file].

**Supplementary Table S4.** Diagnostic specificity, sensitivity, and accuracy of SARS-CoV-2 immunodominant epitopes.

| <b>Antigen</b>   | <b>Epitope position</b>                    | <b>Area Under the Curve</b> | <b>Specificity (Sp) and Sensitivity (Sn), [95% confidence interval]</b> | <b>Likelihood ratio</b> |
|------------------|--------------------------------------------|-----------------------------|-------------------------------------------------------------------------|-------------------------|
| VME1             | 5-19                                       | 1.0<br>P < 0.0001           | Sp=95 [76/99]<br>Sn=86 [85/100]                                         | 17.27                   |
|                  | 145-159                                    | 1.0<br>P < 0.0001           | Sp=95 [76/99]<br>Sn=100 [66/95]                                         | 20.00                   |
| NCAP             | 393-407                                    | 0.9682<br>P < 0.0001        | Sp=95 [76/99]<br>Sn=77 [66/95]                                          | 15.45                   |
| Spike            | 453-467 <sup>a</sup>                       | 0.9614<br>P < 0.0001        | Sp=95 [76/99]<br>Sn=77 [66/95]                                          | 17.27                   |
|                  | 557-571 <sup>b</sup>                       | 0.9455<br>P < 0.0001        | Sp=95 [76/99]<br>Sn=77 [56/89]                                          | 15.45                   |
|                  | 789-803 <sup>c</sup>                       | 0.8977<br>P < 0.0001        | Sp=95 [76/99]<br>Sn=77 [56/89]                                          | 15.45                   |
|                  | 1253-1267 <sup>d</sup>                     | 0.8886<br>P < 0.0001        | Sp=95 [76/99]<br>Sn=63 [42/80]                                          | 12.73                   |
|                  | a + b + c + d                              | 0.979<br>P < 0.0001         | Sp=95 [76/99]<br>Sn=81 [61/92]                                          | 16.36                   |
|                  | b + c + d +<br>VME1 5-19 +<br>VME1 145-159 | 1.0<br>P < 0.0001           | Sp=95 [76/99]<br>Sn=100 [85/100]                                        | 20.00                   |
| Spike-S1 protein |                                            | 1.0<br>P < 0.0001           | Sp=95 [76/99]<br>Sn=100 [85/100]                                        | 20.00                   |

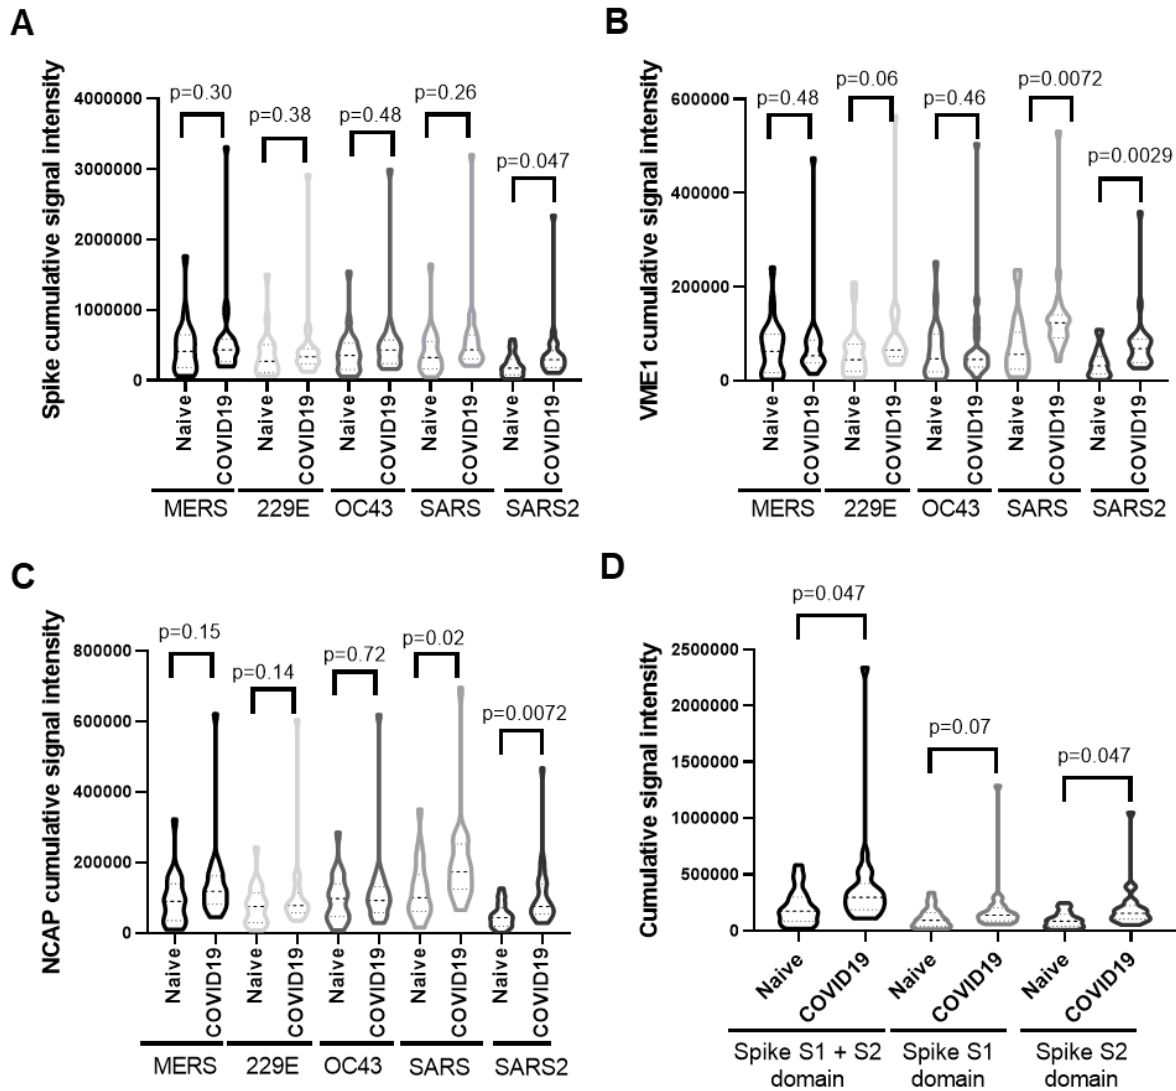

**Supplementary Figure S1. Violin plots showing the distribution of reactivity among naïve (n=20) and COVID-19 convalescent sera (n=22) based on the sum of all peptide reactivities on the immunoarray.** Reactivities restricted to (A) spike, (B) VME1 (membrane protein), and (C) NCAP (nucleoprotein). (D) Distribution of reactivity among the naïve (n=20) and COVID-19 convalescent sera (n=22) based on the sum of all peptide reactivities restricted to the complete SARS-CoV-2 spike protein (Spike S1 + S2 domain), Spike S1 domain, or Spike S2 domain. P values were calculated using a two-sample Komorgolorov-Smrinov test. Dashed line within the violin plot represents the median, dotted line represents the quartiles.

**A**

SPIKE MERS-CoV 885-899      SARSAIEDLLFDKVT  
 SPIKE HCoV-229E 685-699      RVAGRSAIEDILFSK  
 SPIKE HCoV-OC43 901-915      SSRSAIEDLLFDKVK  
 SPIKE SARS-CoV 789-803      PDPLKPTKRSFIEDL  
 SPIKE SARS-CoV-2 813-827      SKRSFIEDLLFNKVT

|       |                                                              |     |
|-------|--------------------------------------------------------------|-----|
| 229E  | N-----LSSVIPSLPTSGSRVAGRSAIEDILFSKLVTSGLGTVDADYKCKT--KGLSIAD | 723 |
| OC43  | NVDDINFSPVLGCLGSECSKASSRSAIEDLLFDKVKLSDVGFVE-AYNNCT--GGAEIRD | 936 |
| MERS  | N-----LTLLEP-VSISTGSRSAIEDLLFDKVTIADPGYMQ-GYDDCMQQGPASARD    | 922 |
| SARS  | N-----FSQILP-DP---LKPTKRSFIEDLLFNKVTADAGFMK-QYGECL--GDINARD  | 830 |
| SARS2 | N-----FSQILP-DP---SKPSKRSFIEDLLFNKVTADAGFIK-QYGDCL--GDIAARD  | 848 |

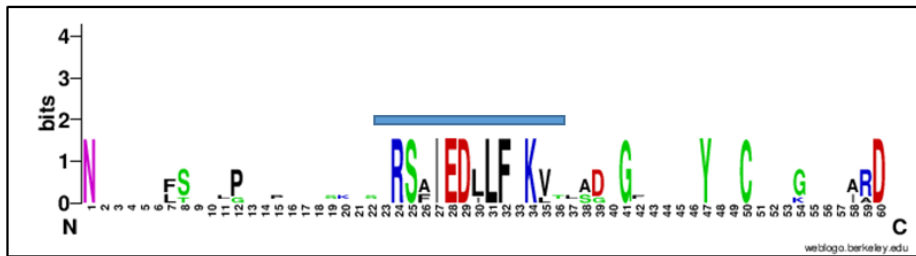

**B**

SPIKE MERS-CoV 1225-1239      NSTGIDFQDELDEFF  
 SPIKE HCoV-OC43 1229-1243      NLPDFKEELDQWFKN  
 SPIKE SARS-CoV 1125-1139      PELDSFKEELDKYFK  
 SPIKE SARS-CoV-2 1145-1159      LDSFKEELDKYFKNH

|       |                                                             |      |
|-------|-------------------------------------------------------------|------|
| 229E  | MVTFVNISRSELQTI--VPEYIDVNKTLQELSYKLPNYTPDL-VVEQYNQTILNLTSEI | 1071 |
| OC43  | AVNYTKAPYVMLN--TSIPNLPDFKEELDQW-FKNQTSVAPDL-SLDYINVTF-----  | 1260 |
| MERS  | VTYQN-ISTNLPPLLGNSTGIDFQDELDEF-FKNVSTSIPIPNFGSLTQINTL-----  | 1259 |
| SARS  | DWVIGIINNTVYDPLQ--PELDSFKEELDKY-FKNHTSPDVLGDISGINASV-----   | 1158 |
| SARS2 | DWVIGIVNNTVYDPLQ--PELDSFKEELDKY-FKNHTSPDVLGDISGINASV-----   | 1176 |

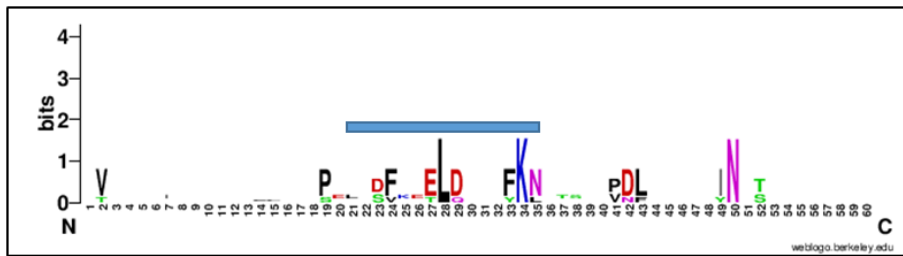

**Supplementary Figure S2. SARS-CoV-2 infection induces antibodies that cross-react with epitopes in related human coronaviruses.** Presented are the SARS-CoV-2 spike epitopes (A & B) that elicited cross-reactive antibody responses to peptides in related human coronaviruses. For each spike epitope: the top panel identifies the peptide printed on the immunoarray and the peptide coordinates within the linear sequence; the middle panel shows the sequence alignment with the printed peptide underlined; and the bottom panel shows the sequence logo generated from the sequence alignments displaying the frequency of specific amino acid residues at each position along the linear peptide sequence. The blue bar in the sequence logos identifies the SARS-CoV-2 epitope. Logos generated using WebLogo (Version 2.8.2; <https://weblogo.berkeley.edu/logo.cgi>).
